# Supplementary material for: Endogenous Interferon-β-Inducible Gene Expression and Interferon-β-Treatment Are Associated with Reduced T Cell Responses to Myelin Basic Protein in Multiple Sclerosis
Source: PubMed Central journal article supplement (PMC4349448; doi:10.1371/journal.pone.0118830), 2015-03-04

**FIGURE S1**

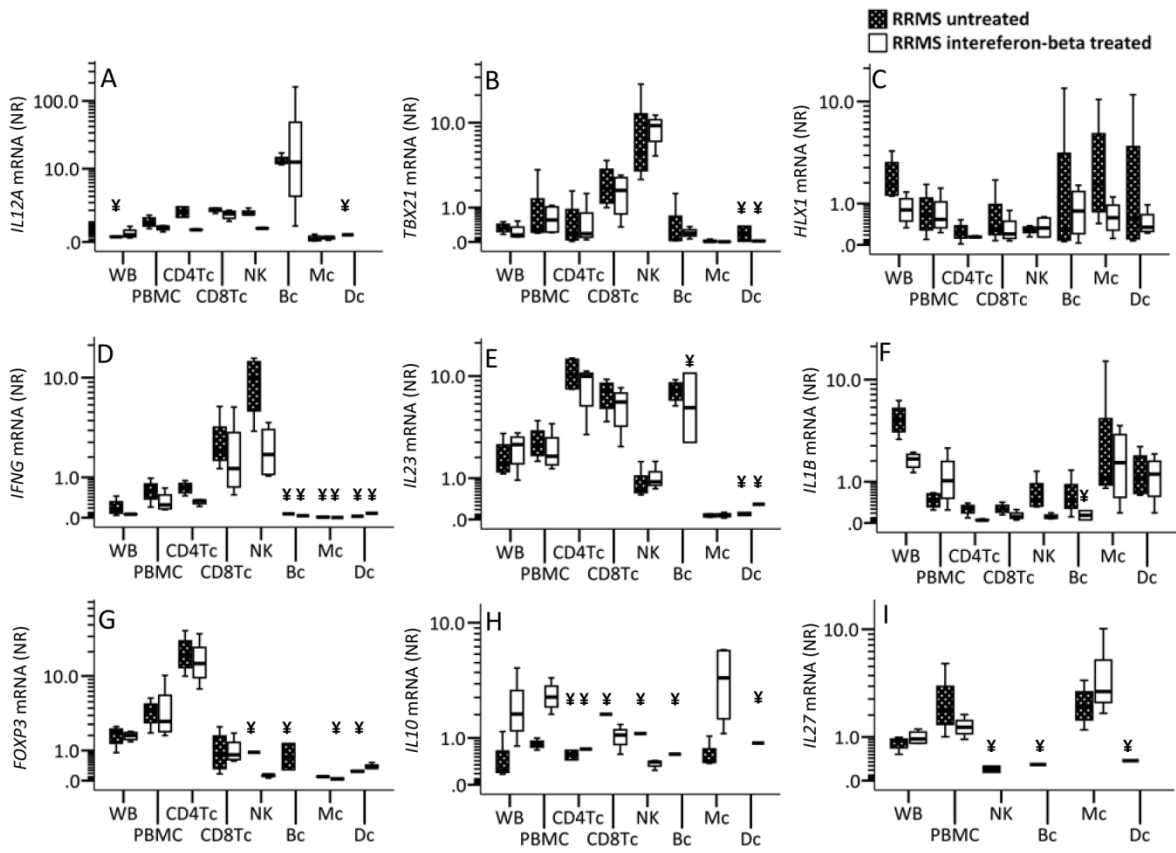

Supplement: pone.0118830.s001.pdf [file pone.0118830.s001.pdf]
