# Supplementary material for: Endogenous Interferon-β-Inducible Gene Expression and Interferon-β-Treatment Are Associated with Reduced T Cell Responses to Myelin Basic Protein in Multiple Sclerosis
Source: PubMed Central journal article supplement (PMC4349448; doi:10.1371/journal.pone.0118830), 2015-03-04
Supplement: pone.0118830.s002.pdf [file pone.0118830.s002.pdf]

**TABLE S2**

| <b>Symbol</b> | <b>Number</b> | <b>PCR analysis of whole blood</b> | <b>Explorative PCR studies on sorted PBMC-subsets</b> | <b>PCR studies on blood derived CD4<sup>+</sup> T-cells and monocytes</b> |
|---------------|---------------|------------------------------------|-------------------------------------------------------|---------------------------------------------------------------------------|
| <i>EBI3</i>   | Hs00194957_m1 | Y                                  |                                                       | Y                                                                         |
| <i>EOMES</i>  | Hs00172872_m1 |                                    |                                                       | Y                                                                         |
| <i>FOXP3</i>  | Hs00203958_m1 | Y                                  | Y                                                     | Y                                                                         |
| <i>GAPDH</i>  | Hs99999905_m1 | Y                                  | Y                                                     |                                                                           |
| <i>GATA3</i>  | Hs00231122_m1 | Y                                  |                                                       | Y                                                                         |
| <i>HLX1</i>   | Hs00172035_m1 | Y                                  | Y                                                     | Y                                                                         |
| <i>IFNG</i>   | Hs99999041_m1 | Y                                  | Y                                                     | Y                                                                         |
| <i>IL12A</i>  | Hs00168405_m1 | Y                                  | Y                                                     | Y                                                                         |
| <i>IL17A</i>  | Hs00174383_m1 |                                    |                                                       | Y                                                                         |
| <i>IL18</i>   | Hs00155517_m1 | Y                                  |                                                       |                                                                           |
| <i>IL1B</i>   | Hs00174097_m1 | Y                                  | Y                                                     | Y                                                                         |
| <i>IL1RN</i>  | Hs00277299_m1 | Y                                  |                                                       |                                                                           |
| <i>IL23</i>   | Hs00372324_m1 | Y                                  | Y                                                     | Y                                                                         |
| <i>IL27</i>   | Hs00377366_m1 | Y                                  | Y                                                     | Y                                                                         |
| <i>IL4</i>    | Hs00174122_m1 | Y                                  |                                                       | Y                                                                         |
| <i>IL6</i>    | Hs00174131_m1 | Y                                  |                                                       | Y                                                                         |
| <i>IL10</i>   | Hs00174086_m1 | Y                                  | Y                                                     | Y                                                                         |
| <i>MAF</i>    | Hs00193519_m1 | Y                                  |                                                       |                                                                           |
| <i>CASC3</i>  | Hs00904832_m1 |                                    |                                                       | Y                                                                         |
| <i>RORA</i>   | Hs00536545_m1 | Y                                  |                                                       |                                                                           |
| <i>RORC</i>   | Hs01076116_g1 | Y                                  |                                                       |                                                                           |
| <i>RORC</i>   | Hs01076112_m1 |                                    |                                                       | Y                                                                         |
| <i>TBX21</i>  | Hs00203436_m1 | Y                                  | Y                                                     | Y                                                                         |
| <i>TGFB1</i>  | Hs99999918_m1 | Y                                  |                                                       | Y                                                                         |
| <i>TNF</i>    | Hs00174128_m1 | Y                                  |                                                       | Y                                                                         |
| <i>UBE2D2</i> | Hs00366152_m1 |                                    |                                                       | Y                                                                         |
