# Supplementary material for: Endogenous Interferon-β-Inducible Gene Expression and Interferon-β-Treatment Are Associated with Reduced T Cell Responses to Myelin Basic Protein in Multiple Sclerosis
Source: PubMed Central journal article supplement (PMC4349448; doi:10.1371/journal.pone.0118830), 2015-03-04
Supplement: pone.0118830.s003.pdf [file pone.0118830.s003.pdf]

**TABLE S3**

| Specificity                                                  | Isotype         | Clone     | Host  | Fluorochrom  | Provider                  |
|--------------------------------------------------------------|-----------------|-----------|-------|--------------|---------------------------|
| CD3                                                          | IgG1, $\kappa$  | UCHT1     | Mouse | Pacific Blue | BD Biosciences, Denmark   |
| CD4                                                          | IgG1, $\kappa$  | RPA-T4    | Mouse | PerCP/Cy5.5  | Biolegend, USA            |
| CD8                                                          | IgG1, $\kappa$  | HIT8a     | Mouse | PE-Cy7       | BD Biosciences, Denmark   |
| CD19                                                         | IgG1, $\kappa$  | HIB19     | Mouse | APC-Cy7      | Biolegend, USA            |
| IL-17                                                        | IgG1, $\kappa$  | BL168     | Mouse | PE           | Biolegend, USA            |
| IFN- $\gamma$                                                | IgG1, $\kappa$  | B27       | Mouse | APC          | Biolegend, USA            |
| IL-4                                                         | IgG1, $\kappa$  | 8D4-8     | Mouse | PE           | BD Biosciences, Denmark   |
| TNF- $\alpha$                                                | IgG1, $\kappa$  | MAb11     | Mouse | APC          | BD Biosciences, Denmark   |
| IL-13                                                        | IgG1, $\kappa$  | JES10-5A2 | Rat   | PE           | BD Biosciences, Denmark   |
| IL-10                                                        | IgG2a, $\kappa$ | JES3-19F1 | Rat   | APC          | BD Biosciences, Denmark   |
|                                                              | IgG1, $\kappa$  | MOPC-21   | Mouse | PE           | Biolegend, USA            |
|                                                              | IgG2b, $\kappa$ | MPC-11    | Mouse | PE           | Biolegend, USA            |
|                                                              | IgG1, $\kappa$  | RTK2071   | Rat   | PE           | Biolegend, USA            |
|                                                              | IgG2a, $\kappa$ | R35-95    | Rat   | APC          | BD Biosciences, Denmark   |
|                                                              | IgG1, $\kappa$  | MOPC-21   | Mouse | APC          | Biolegend, USA            |
| CellTrace™ CFSE Cell Proliferation Kit                       |                 |           |       |              | Molecular Probes, Denmark |
| Live/Dead® Fixable Aqua Cell Stain Kit for 405 nm excitation |                 |           |       |              | Invitrogen, Denmark       |
